# Supplementary material for: Indole-based conjugated macromolecules as a redox-mediated electrolyte for an ultrahigh power supercapacitor
Source: Royal Society of Chemistry journal article supplement (doi:10.1039/c7ee02584j), 2017-01-01
Supplement: c7ee02584j1.pdf [file c7ee02584j1.pdf]

## Supplementary Information

# Indole-Based Conjugated Macromolecule as Redox-Mediated Electrolyte for Ultrahigh Power Supercapacitor

Ting Xiong<sup>a,b,†</sup>, Wee Siang Vincent Lee<sup>a,†</sup>, Li Chen<sup>c</sup>, Teck Leong Tan<sup>d</sup>, Xiaolei Huang<sup>\*a</sup>, Junmin Xue<sup>\*a</sup>

<sup>a</sup> National University of Singapore, Department of Materials Science and Engineering, Singapore 117573.

<sup>b</sup> Centre for Advanced 2D Materials and Graphene Research Centre, National University of Singapore, Singapore 117546.

<sup>c</sup> Department of Chemistry, Tianjin University, Tianjin 300072, People's Republic of China

<sup>d</sup> Institute of High Performance Computing, A\*STAR, 1 Fusionopolis Way, #16-16 Connexis, Singapore 138632

<sup>†</sup>To whom correspondence should be addressed. E-mail: msxuejm@nus.edu.sg (Junmin Xue), msehx@nus.edu.sg (Xiaolei Huang), Tel./fax +65 65164655.

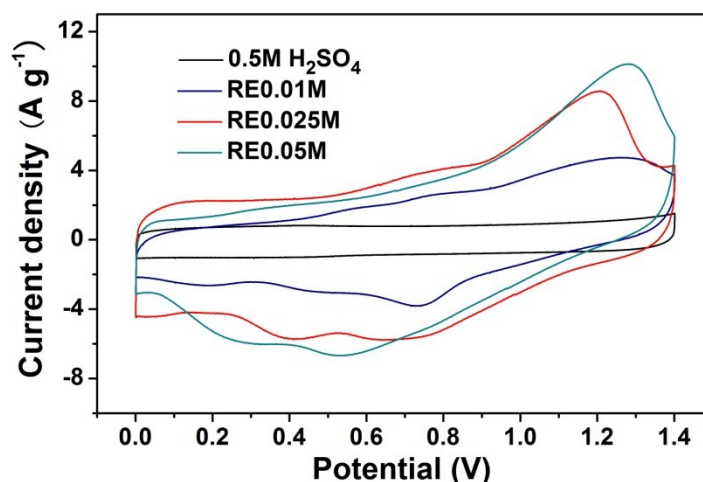

**Fig. S1** CV curves of the obtained porous honeycomb-like carbon using dopamine with different concentration as the redox-active additive at scan rate of  $25 \text{ mV s}^{-1}$ .

Inspired by this, we firstly studied dopamine as a redox additive in supercapacitor. By using the prepared porous honeycomb-like carbon (labeled as PHC) as the electrode material, we tested the capacitive performance of the redox-active electrolyte using a two-electrode configuration. As shown in Fig. S1, PHC showed excellent rectangle-like cyclic voltammetry curves in  $0.5 \text{ M H}_2\text{SO}_4$  in the potential range of  $0 - 1.4 \text{ V}$ . The addition of dopamine into  $0.5 \text{ M H}_2\text{SO}_4$  solution caused increases in capacitance, and the capacitance increased gradually with the concentration of dopamine from  $0.01 \text{ M}$  to  $0.05 \text{ M}$  (certain amount of dopamine chloride was dissolved into  $50 \text{ mL}$  of  $0.5 \text{ M H}_2\text{SO}_4$  to obtain  $0.01 \text{ mol L}^{-1}$  ( $\text{M}$ ),  $0.025 \text{ M}$ , and  $0.05 \text{ M}$  dopamine solution, which were labeled as RE0.01M, RE0.025M and RE0.05M, respectively). Notably, strong peaks related to the redox reaction of phenolic hydroxyl group/quinoid carbonyl group (equation (1)) were observed, which contributed to the pseudocapacitance. Among the three redox electrolytes, the cyclic voltammetry curves of the porous honeycomb-like carbon in RE0.025M electrolyte was much rectangle-like, suggesting that the optimal concentration of dopamine was  $0.025 \text{ M}$ .

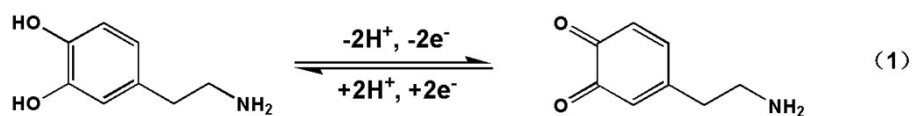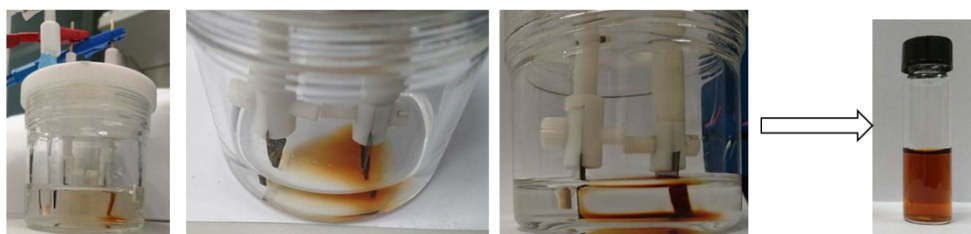

**Fig. S2** The transformation process of RE0.025M to BRE0.025M in the three electrode at scan rate of  $1000 \text{ mV s}^{-1}$ .

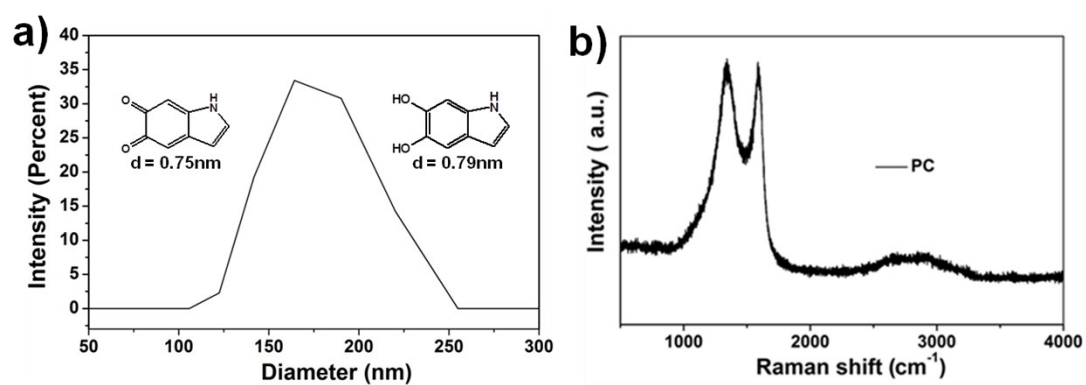

**Fig. S3** a) The size distribution of the molecules in BRE0.025M electrolytes; b) The Raman spectrum of PC.

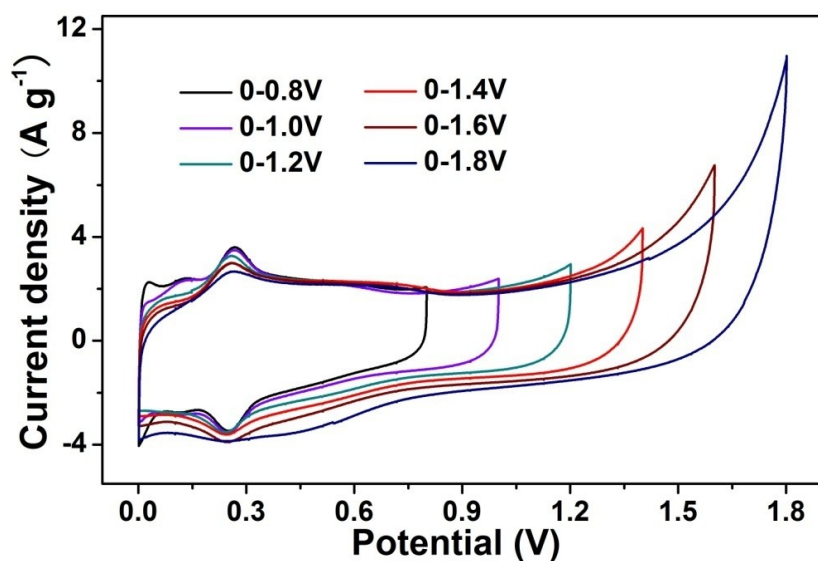

**Fig. S4** The cyclic voltammetry (CV) curves of the porous honeycomb-like carbon with step-wise potential increment of 0.2 V from an initial potential window of 0.8 V to a final potential window of 1.8V in BRE0.025M electrolyte at scan rate of 25 mV s<sup>-1</sup>.

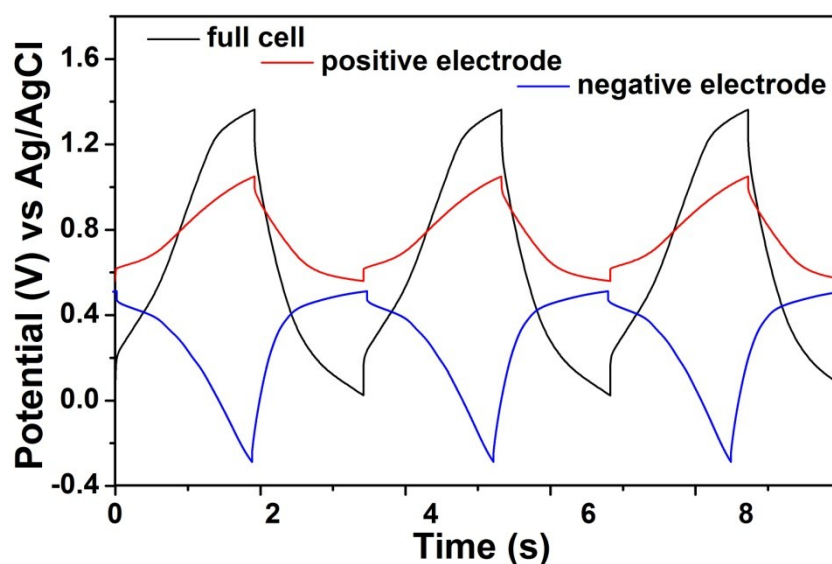

**Fig. S5** Three electrodes test to investigate the individual contribution of negative and positive electrodes in the BRE0.025M electrolyte.

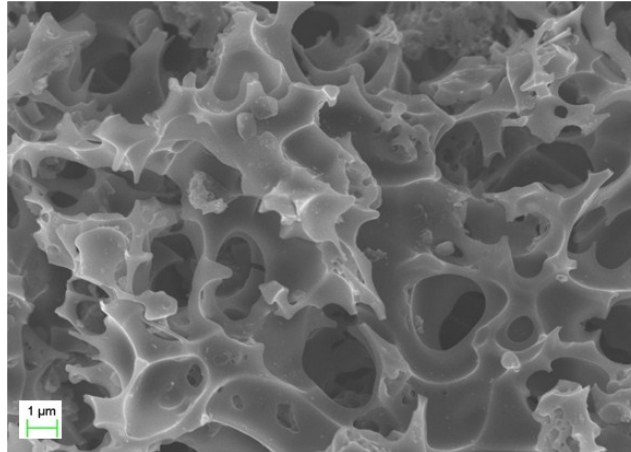

**Fig. S6** SEM image of PC.

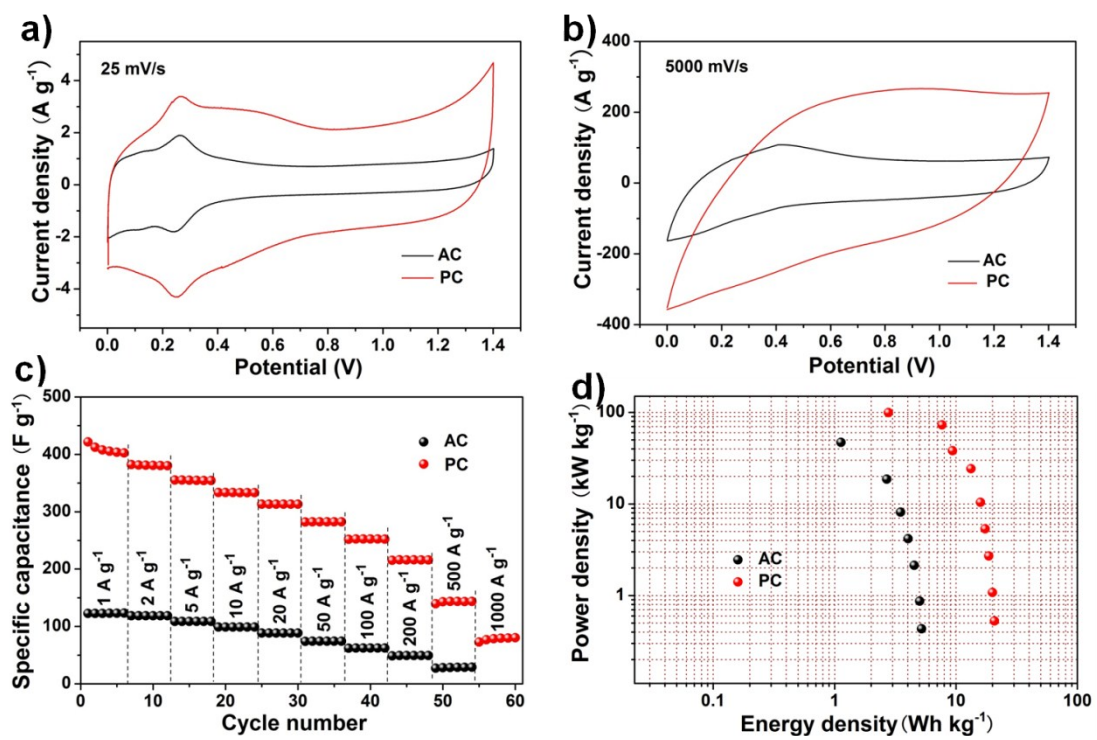

**Fig. S7** Electrochemical characterization of AC and PC using BRE0.025M electrolyte. (a),(b), CV curves; (c) rate performance at different current densities; (d) Ragone plot.

|           | Carbon paper                                                                                                    | AC                                                                                                              | PC                                                                                                             | PHC                                                                                                             |
|-----------|-----------------------------------------------------------------------------------------------------------------|-----------------------------------------------------------------------------------------------------------------|----------------------------------------------------------------------------------------------------------------|-----------------------------------------------------------------------------------------------------------------|
| RE0.025M  | Angles: [117.20°, 118.30°]<br>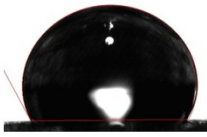 | Angles: [112.90°, 113.20°]<br> | Angles: [97.60°, 96.60°]<br> | Angles: [87.90°, 90.90°]<br> |
| BRE0.025M | Angles: [108.00°, 106.70°]<br> | Angles: [98.50°, 100.50°]<br>  | Angles: [81.00°, 80.50°]<br> | Angles: [76.90°, 76.90°]<br> |

**Fig. S8** Dynamic electrolyte contact angle measurements for the bare carbon paper, porous honeycomb-like carbon (PHC), activated carbon (AC) and another porous carbon (PC) in the RE0.025M and BRE0.025M electrolytes.

**Table S1.** Comparison of the supercapacitor performance parameters for redox supercapacitors and our present work.

| Active material                                             | Electrolytes                                                                                                      | Potential window | Capacitance                  | Max Energy density                               | Max Power density           | Capacitance retention       | Ref.      |
|-------------------------------------------------------------|-------------------------------------------------------------------------------------------------------------------|------------------|------------------------------|--------------------------------------------------|-----------------------------|-----------------------------|-----------|
| Activated carbon                                            | Fe(CN) <sub>6</sub> <sup>3-</sup> /<br>Fe(CN) <sub>6</sub> <sup>4-</sup> in<br>1M Na <sub>2</sub> SO <sub>4</sub> | 0–2 V            | 364.6 mF<br>cm <sup>-2</sup> | 18.9 Wh kg <sup>-1</sup>                         | 11.5<br>kW kg <sup>-1</sup> | 80% after<br>7000 cycles    | 1         |
| Activated carbon (KOH activated)                            | 0.38 M<br>Hydroquinone<br>in 1 M H <sub>2</sub> SO <sub>4</sub>                                                   | 0–1 V            | 901 F g <sup>-1</sup>        | 18 Wh kg <sup>-1</sup>                           | 12 kW kg <sup>-1</sup>      | 65% after<br>4000 cycle     | 2         |
| N/O-functionalized nanoporous carbon                        | Pyrocatechol in<br>1 M H <sub>2</sub> SO <sub>4</sub>                                                             | 0–1 V            | 368.7 F g <sup>-1</sup>      | 124.4<br>Wh kg <sup>-1</sup>                     | 29.9<br>kW kg <sup>-1</sup> | 96.4% after<br>5000 cycles  | 3         |
| carbon/1, 4-dihydroxyanthraquinone                          | Hydroquinone<br>in 1M H <sub>2</sub> SO <sub>4</sub>                                                              | 0–1 V            | 239 F g <sup>-1</sup>        | 21.1 Wh kg <sup>-1</sup>                         | 5.0 kW kg <sup>-1</sup>     | 91.6 % after<br>5000 cycles | 4         |
| carbon nanosheets                                           | Anthraquinone-2-sulfonic acid sodium and KI in 1M KNO <sub>3</sub>                                                | 0–1.8 V          | 75 F g <sup>-1</sup>         | 33.8 Wh kg <sup>-1</sup>                         | 10 kW kg <sup>-1</sup>      | 95.2 % after<br>5000 cycles | 5         |
| Hierarchical α-MnO <sub>2</sub> tube-on-tube arrays         | 1.0 M Na <sub>2</sub> SO <sub>4</sub>                                                                             | 0–0.8 V          | 213 F g <sup>-1</sup>        | 20.8 Wh kg <sup>-1</sup>                         | 3.2 kW kg <sup>-1</sup>     | —                           | 6         |
| phosphate ion functionalized Co <sub>3</sub> O <sub>4</sub> | 6.0 M KOH                                                                                                         | 0–1.5 V          | 229 F g <sup>-1</sup>        | 71.58<br>Wh kg <sup>-1</sup>                     | 24 kW kg <sup>-1</sup>      | 95% after<br>2000 cycles    | 7         |
| Mn <sub>3</sub> O <sub>4</sub> embedded on carbon           | 1 M Na <sub>2</sub> SO <sub>4</sub>                                                                               | 0–0.8 V          | 195 F g <sup>-1</sup>        | 4.3 Wh kg <sup>-1</sup>                          | 52 kW kg <sup>-1</sup>      | 59% after 60h               | 8         |
| Fe(CN) <sub>6</sub> <sup>3-</sup> modified Carbon           | 1 M Na <sub>2</sub> SO <sub>4</sub>                                                                               | 0–1.8 V          | 15 Wh kg <sup>-1</sup><br>—  | 15 Wh kg <sup>-1</sup><br>15 Wh kg <sup>-1</sup> | 79.1 kW kg <sup>-1</sup>    | 100% after<br>20000 cycles  | 9         |
| Porous honeycomb-like carbon                                | indole-based conjugated macromolecular in 0.5 M H <sub>2</sub> SO <sub>4</sub>                                    | 0–1.4 V          | 550 F g <sup>-1</sup>        | 31.6 Wh kg <sup>-1</sup>                         | 153 kW kg <sup>-1</sup>     | 97.1% after<br>20000 cycles | this work |

**Table S2.** Comparison of the supercapacitor performance parameters for EDLC supercapacitors and our present work.

| Active material                                           | Electrolytes                                                                   | Potential window | Capacitance             | Max Energy density       | Max Power density         | Capacitance retention     | Ref.      |
|-----------------------------------------------------------|--------------------------------------------------------------------------------|------------------|-------------------------|--------------------------|---------------------------|---------------------------|-----------|
| 3D porous RGO films                                       | 1.0 M H <sub>2</sub> SO <sub>4</sub>                                           | 0–1 V            | 284.2 F g <sup>-1</sup> | 9.9 Wh kg <sup>-1</sup>  | 282 kW kg <sup>-1</sup>   | 97.6% after 10000 cycles  | 10        |
| 3D Few-Layer Graphene-like Carbon                         | 6 M KOH                                                                        | 0–1 V            | 219 F g <sup>-1</sup>   | 8 Wh kg <sup>-1</sup>    | 199.7 kW kg <sup>-1</sup> | 99% after 20000 cycles    | 11        |
| porous carbon foam electrode with multiscale pore network | LiOH-PVA                                                                       | 0–1 V            | 315.2 F g <sup>-1</sup> | 10.4 Wh kg <sup>-1</sup> | 250 kW kg <sup>-1</sup>   | 97.6 % after 10000 cycles | 12        |
| Nitrogen-doped mesoporous carbon                          | 0.5 M H <sub>2</sub> SO <sub>4</sub>                                           | 0–1.2 V          | 855 F g <sup>-1</sup>   | 39.5 Wh kg <sup>-1</sup> | 42.5 kW kg <sup>-1</sup>  | 82 % after 50000 cycles   | 13        |
| N-Doped carbon nanocages                                  | 6 M KOH                                                                        | 0–1 V            | 313 F g <sup>-1</sup>   | 10.9 Wh kg <sup>-1</sup> | 22.2 kW kg <sup>-1</sup>  | 98% after 50000 cycles    | 14        |
| Graphene films                                            | 6 M KOH                                                                        | 0–1 V            | 178 F g <sup>-1</sup>   | ~6 Wh kg <sup>-1</sup>   | 112.6 kW kg <sup>-1</sup> | 95 % after 2000 cycles    | 15        |
| Porous honeycomb-like carbon                              | indole-based conjugated macromolecular in 0.5 M H <sub>2</sub> SO <sub>4</sub> | 0–1.4 V          | 550 F g <sup>-1</sup>   | 31.6 Wh kg <sup>-1</sup> | 153 kW kg <sup>-1</sup>   | 97.1% after 20000 cycles  | this work |



## References

- 1 J. Y. Hwang, M. Li, M. F. El-Kady and R. B. Kaner, *Adv. Funct. Mater.*, 2017, **27**, 1605745.
- 2 S. Roldán, C. Blanco, M. Granda, R. Menéndez and R. Santamaría, *Angew. Chem. Int. Ed.*, 2011, **50**, 1699–1701.
- 3 Y. F. Nie, Q. Wang, X. Y. Chen and Z. J. Zhang, *J. Power Sources*, 2016, **320**, 140–152.
- 4 D. Xu, X. N. Sun, W. Hu and X. Y. Chen, *J. Power Sources*, 2017, **357**, 107–116.
- 5 X. N. Sun, D. Xu, W. Hu and X. Y. Chen, *ACS Sustainable Chem. Eng.*, 2017, **5**, 5972–5981.
- 6 B. Z. Yu, X. D. Zhao, J. Luo, H. G. Zhang, Y. W. Zhu, G. Y. Jing, P. Ma, Z. Y. Ren and H. M. Fan, *Adv. Mater. Interfaces*, 2016, **3**, 1500761.
- 7 T. Zhai, L. Wan, S. Sun, Q. Chen, J. Sun, Q. Xia and H. Xia, *Adv. Mater.*, 2017, **29**, 1604167.
- 8 K. Makgopa, K. Raju, P. M. Ejikeme and K. I. Ozoemena, *Carbon*, 2017, **117**, 20–32.
- 9 L. Sheng, L. Jiang, T. Wei, Z. Liu and Z. Fan, *Adv. Energy Mater.*, 2017, 1700668.
- 10 Y. Shao, M. F. El-Kady, C.-W. Lin, G. Zhu, K. L. Marsh, J. Y. Hwang, Q. Zhang, Y. Li, H. Wang and R. B. Kaner, *Adv. Mater.*, 2016, **28**, 6719–6726.
- 11 J. Zhao, Y. Jiang, H. Fan, M. Liu, O. Zhuo, X. Wang, Q. Wu, L. Yang, Y. Ma and Z. Hu, *Adv. Mater.*, 2017, **29**, 1604569.
- 12 F. Zhang, T. Liu, M. Li, M. Yu, Y. Luo, Y. Tong and Y. Li, *Nano Lett.*, 2017, **17**, 3097–3104.
- 13 T. Lin, I.-W. Chen, F. Liu, C. Yang, H. Bi, F. Xu and F. Huang, *Science*, 2015, **350**, 1508–1513.
- 14 J. Zhao, H. Lai, Z. Lyu, Y. Jiang, K. Xie, X. Wang, Q. Wu, L. Yang, Z. Jin, Y. Ma, J. Liu and Z. Hu, *Adv. Mater.*, 2015, **27**, 3541–3545.
- 15 Z. Bo, W. Zhu, W. Ma, Z. Wen, X. Shuai, J. Chen, J. Yan, Z. Wang, K. Cen, X. Feng, *Adv. Mater.*, 2013, **25**, 5799–5806.
